# Supplementary material
Source: HighWire-hosted journal article supplement (http://adc.bmjjournals.com/highwire/filestream/186711/field_highwire_adjunct_files/1/928678webonlyfig2.pdf)
Supplement: 928678webonlyfig2.pdf [file 928678webonlyfig2.pdf]

| Demography |     | PAQLQ(S) scores |             |           | PACQLQ scores |             |
|------------|-----|-----------------|-------------|-----------|---------------|-------------|
| Age        | Sex | Symptoms        | Limitations | Emotional | Total         | Limitations |
| 10         | 1   | 3.1             | 1.8         | 4.75      | 3.2           | 5.5         |
| 10         | 1   | 6.3             | 4.6         | 4.625     | 5.2           | 6.75        |
| 15         | 2   | 6.9             | 5.4         | 7         | 6.4           | 7           |
| 16         | 1   | 2.6             | 2.8         | 4.5       | 3.3           | 7           |
| 16         | 1   | 6.6             | 5.6         | 6.75      | 6.3           | 6.75        |
| 14         | 1   | 5               | 5.4         | 5.25      | 5.2           | 7           |
| 15         | 2   | 2.2             | 2.2         | 2.375     | 2.3           | 3.75        |
| 16         | 1   | 7               | 7           | 7         | 7.0           | 7           |
| 7          | 1   | 4.7             | 5.8         | 5.5       | 5.3           | 4.5         |
| 14         | 1   | 4               | 6           | 5.25      | 5.1           | 4.5         |
| 15         | 2   | 6.2             | 7           | 7         | 6.7           | 5.5         |
| 7          | 2   | 4.7             | 4.8         | 3.75      | 4.4           | 4           |
| 9          | 1   | 3.7             | 2.2         | 2.875     | 2.9           | 4           |
| 12         | 1   | 5.8             | 5.2         | 5.875     | 5.6           | 6.75        |
| 15         | 2   | 5.5             | 4           | 5.875     | 5.1           | 7           |
| 13         | 2   | 7               | 6.8         | 6.875     | 6.9           | 7           |
| 10.4       | 1   | 7               | 6.8         | 6.625     | 6.8           | 7           |
| 12.5       | 1   | 6               | 5.4         | 6.625     | 6.0           | 4.75        |
| 10         | 2   | 6.2             | 7           | 6.875     | 6.7           | 7           |
| 8          | 2   | 6.3             | 5.6         | 7         | 6.3           | 5.75        |
| 13         | 2   | 2.9             | 3.2         | 3.75      | 3.3           | 6.5         |
| 17         | 1   | 6.6             | 6.4         | 6.625     | 6.5           | 5.5         |
| 17         | 2   | 6.2             | 7           | 6.375     | 6.5           | 7           |
| 9          | 1   | 4               | 3           | 4.75      | 3.9           | 6.5         |
| 7          | 1   | 6.8             | 7           | 7         | 6.9           | 7           |
| 15         | 1   | 6.9             | 6           | 6.75      | 6.6           | 7           |
| 10         | 2   | 3.7             | 2.8         | 4.375     | 3.6           | 6.25        |
| 13         | 2   | 3               | 2.2         | 3.125     | 2.8           | 2.25        |
| 7          | 2   | 6.2             | 6.3         | 5.25      | 5.9           | 6.5         |
| 11         | 2   | 6.6             | 5.8         | 6.5       | 6.3           | s           |
| 15         | 2   | 5.7             | 5.6         | 5.25      | 5.5           | 6.5         |
| 11         | 2   | 7               | 7           | 7         | 7.0           | 7           |
| 16         | 1   | 6.6             | 6           | 6.875     | 6.5           | 7           |
| 8          | 2   | 6.9             | 5.5         | 6.625     | 6.3           | 7           |
| 9          | 1   | 6.7             | 6           | 6.875     | 6.5           | 7           |
| 15         | 1   | 4.9             | 3.8         | 3.125     | 3.9           | 3.25        |
| 9          | 1   | 6.3             | 4.4         | 6.5       | 5.7           | 7           |
| 15         | 1   | 5.6             | 4.7         | 6.375     | 5.5           | 6.75        |
| 16         | 1   | 6.5             | 4.4         | 6.5       | 5.8           | 7           |
| 11         | 2   | 5.1             | 3.6         | 5.125     | 4.6           | 6.25        |
| 7.5        | 1   | 6.9             | 4           | 6.625     | 5.8           | 7           |
| 11         | 2   | 6.5             | 7           | 7         | 6.8           | 7           |
| 16         | 1   | 6.2             | 5           | 6.125     | 5.8           | 6.5         |
| 9          | 1   | 3.1             | 3           | 3.25      | 3.1           | 4.25        |
| 15         | 1   | 4               | 2.4         | 5.375     | 3.9           | 7           |
| 14         | 1   | 6.4             | 6.2         | 7         | 6.5           | 6           |
| 15         | 1   | 5.5             | 2.2         | 5.5       | 4.4           | 7           |
| 15         | 1   | 5.5             | 5.8         | 6.75      | 6.0           | 4.25        |
| 14         | 1   | 6.5             | 5.2         | 6.875     | 6.2           | 7           |
| 17         | 2   | 5.8             | 6.75        | 6.75      | 6.4           | 7           |
| 12         | 1   | 3.2             | 3           | 5.875     | 4.0           | 2.5         |
| 17         | 2   | 6.9             | 6.4         | 6.25      | 6.5           | 7           |
| 11         | 1   | 7               | 5           | 6.875     | 6.3           | 7           |
| 8          | 1   | 5.8             | 4.2         | 5.875     | 5.3           | 6.25        |

|      |   |     |      |       |     |      |
|------|---|-----|------|-------|-----|------|
| 9    | 2 | 3.9 | 3.6  | 4.5   | 4.0 | 2.25 |
| 12   | 1 | 6.7 | 6.2  | 6.875 | 6.6 | 7    |
| 12   | 1 | 6   | 4.2  | 6.5   | 5.6 | 6.5  |
| 16.5 | 1 | 7   | 7    | 7     | 7.0 | 6.75 |
| 15   | 1 | 7   | 7    | 7     | 7.0 | 7    |
| 8    | 2 | 5   | 5.8  | 6.625 | 5.8 | 6.5  |
| 15.5 | 2 | 7   | 7    | 6.375 | 6.8 | 7    |
| 14.3 | 2 | 3.9 | 2.8  | 5.625 | 4.1 | 6.75 |
| 12   | 2 | 6.1 | 6.8  | 6.75  | 6.6 | 6.25 |
| 17   | 2 | 6.1 | 4.2  | 6.5   | 5.6 | 2.5  |
| 12   | 1 | 6.2 | 4    | 6.5   | 5.6 | 7    |
| 17   | 2 | 6.9 | 7    | 7     | 7.0 | 7    |
| 8    | 1 | 6.3 | 5.8  | 7     | 6.4 | 6.75 |
| 15   | 1 | 4   | 4.6  | 6.625 | 5.1 | 6    |
| 15   | 1 | 6   | 3.4  | 6.75  | 5.4 | 7    |
| 9    | 1 | 3   | 2.6  | 3.375 | 3.0 | 4.25 |
| 9    | 1 | 6.5 | 6.6  | 6.625 | 6.6 | 7    |
| 13.5 | 1 | 5.8 | 4.4  | 5.375 | 5.2 | 6.75 |
| 17   | 1 | 2.2 | 4.4  | 5.375 | 4.0 | 5.25 |
| 8    | 1 | 7   | 7    | 7     | 7.0 | 7    |
| 9    | 1 | 4.4 | 5.8  | 4     | 4.7 | 7    |
| 11.5 | 2 | 6.8 | 6.8  | 7     | 6.9 | 7    |
| 12   | 1 | 6.2 | 5    | 6.375 | 5.9 | 6.75 |
| 11   | 2 | 3.9 | 5.2  | 6.125 | 5.1 | 5.5  |
| 10   | 2 | 2.5 | 3.8  | 5.125 | 3.8 | 6    |
| 9.5  | 2 | 4.8 | 6.4  | 4.875 | 5.4 | 4.75 |
| 11   | 1 | 2.5 | 3    | 3.75  | 3.1 | 7    |
| 17   | 2 | 3   | 2.2  | 3.875 | 3.0 | 6.75 |
| 12.5 | 1 | 4.8 | 3.6  | 6.625 | 5.0 | 6.5  |
| 7    | 1 | 2.9 | 2.4  | 2.75  | 2.7 | 2.75 |
| 13   | 2 | 5   | 4.8  | 5.25  | 5.0 | 5    |
| 12   | 2 | 4.8 | 4.6  | 3.25  | 4.2 | 4.75 |
| 9    | 1 | 4.7 | 4.2  | 4.875 | 4.6 | 5.5  |
| 9.5  | 1 | 6.2 | 4.8  | 6.25  | 5.8 | 6.25 |
| 9    | 2 | 3.4 | 3.2  | 7     | 4.5 | 5.75 |
| 13   | 2 | 2.1 | 2.8  | 3.75  | 2.9 | 2.25 |
| 13   | 1 | 5.7 | 4.8  | 5.625 | 5.4 | 5.75 |
| 9    | 2 | 3.9 | 5.2  | 6.625 | 5.2 | 5    |
| 7    | 1 | 1.9 | 2.2  | 2.75  | 2.3 | 2.75 |
| 16.5 | 1 | 6.6 | 6.2  | 6.5   | 6.4 | 7    |
| 8    | 2 | 3.6 | 2.4  | 2.5   | 2.8 | 2.75 |
| 14   | 1 | 6.5 | 7    | 6.5   | 6.7 | 7    |
| 15   | 1 | 5.6 | 6.4  | 6.25  | 6.1 | 6.5  |
| 12   | 1 | 3.6 | 3.6  | 5.25  | 4.2 | 1    |
| 13   | 2 | 5.6 | 5.75 | 6.75  | 6.0 | 6.75 |
| 10   | 2 | 6.6 | 6.4  | 5.75  | 6.3 | 6.75 |
| 12   | 1 | 6.9 | 7    | 7     | 7.0 | 7    |
| 14   | 2 | 5.8 | 6    | 6.5   | 6.1 | 7    |
| 17   | 1 | 5.7 | 5    | 5.875 | 5.5 | 7    |
| 9    | 2 | 6.6 | 4.6  | 6.875 | 6.0 | 7    |
| 16   | 2 | 2.9 | 3.4  | 4     | 3.4 | 5.25 |
| 12   | 1 | 5.2 | 4.2  | 5.875 | 5.1 | 3.75 |
| 9    | 1 | 6.2 | 5.8  | 6.125 | 6.0 | 6.5  |
| 12   | 1 | 6.6 | 4    | 6.125 | 5.6 | 7    |
| 8    | 2 | 5.9 | 4.8  | 6.625 | 5.8 | 5    |
| 12   | 1 | 6.4 | 4.6  | 5.75  | 5.6 | 7    |

|    |   |     |     |       |     |      |
|----|---|-----|-----|-------|-----|------|
| 17 | 1 | 5.3 | 3.5 | 5     | 4.6 | 3.25 |
| 16 | 2 | 3.5 | 5.4 | 5.375 | 4.8 | 6.25 |
| 11 | 2 | 2.9 | 4.6 | 5.125 | 4.2 | 3    |
| 12 | 1 | 3.2 | 3   | 4.875 | 3.7 | 6.5  |
| 10 | 1 | 4.5 | 3.8 | 5     | 4.4 | 6.75 |

| Emotional | Spirometry |      |          | FEF25-75 | Physicians score      |
|-----------|------------|------|----------|----------|-----------------------|
|           | Total      | FEV1 | FEV1/FVC |          | clinical asthma score |
| 4         | 4.75       | 100  | 86       | 68       | 1                     |
| 5.56      | 6.15       | 76   | 80       | 59       | 1                     |
| 7         | 7          | 93   | 96       | 108      | 1                     |
| 6.22      | 6.61       | 96   | 90       | 99       | 1                     |
| 6.33      | 6.54       | 83   | 89       | 93       | 1                     |
| 6.56      | 6.78       | 94   | 82       | 81       | 1                     |
| 2.56      | 3.15       | 77   | 85       | 76       | 1                     |
| 5.56      | 6.28       | 99   | 81       | 92       | 1                     |
| 3.89      | 4.19       | 105  | 97       | 125      | 1                     |
| 3.78      | 4.14       | 108  | 96       | 140      | 1                     |
| 3.44      | 4.47       | 80   | 93       | 88       | 1                     |
| 4.11      | 4.06       | 99   | 114      | 125      | 1                     |
| 3.11      | 3.56       | 100  | 88       | 99       | 1                     |
| 4.67      | 5.71       | 76   | 82       | 63       | 1                     |
| 7         | 7          | 86   | 84       | 73       | 1                     |
| 7         | 7          | 110  | 88       | 115      | 1                     |
| 7         | 7          | 91   | 78       | 71       | 1                     |
| 4.89      | 4.82       | 74   | 87       | 69       | 1                     |
| 7         | 7          | 83   | 89       | 82       | 1                     |
| 5.22      | 5.49       | 81   | 92       | 88       | 1                     |
| 5.22      | 5.86       | 88   | 80       | 69       | 1                     |
| 3.78      | 4.64       | 88   | 67       | 56       | 2                     |
| 7         | 7          | 82   | 102      | 76       | 2                     |
| 4.56      | 5.53       | 95   | 86       | 79       | 2                     |
| 5.67      | 6.33       | 100  | 82       | 80       | 2                     |
| 6.11      | 6.56       | 97   | 87       | 97       | 2                     |
| 5.33      | 5.79       | 82   | 97       | 74       | 2                     |
| 3.33      | 2.79       | 85   | 83       | 74       | 2                     |
| 5.78      | 6.14       | 77   | 100      | 58       | 2                     |
| 5.78      | 6.39       | 96   | 91       | 103      | 2                     |
| 6.22      | 6.36       | 92   | 79       | 71       | 2                     |
| 7         | 7          | 97   | 87       | 99       | 2                     |
| 6.78      | 6.89       | 76   | 85       | 69       | 2                     |
| 6.56      | 6.78       | 86   | 90       | 93       | 2                     |
| 7         | 7          | 77   | 88       | 82       | 2                     |
| 2.67      | 2.96       | 60   | 69       | 35       | 2                     |
| 6.67      | 6.83       | 98   | 93       | 107      | 2                     |
| 6.89      | 6.82       | 83   | 74       | 59       | 2                     |
| 5.89      | 6.44       | 102  | 79       | 82       | 2                     |
| 5.89      | 6.07       | 92   | 82       | 80       | 2                     |
| 5.89      | 6.44       | 118  | 89       | 115      | 2                     |
| 6.56      | 6.78       | 97   | 71       | 58       | 2                     |
| 4.67      | 5.58       | 114  | 87       | 115      | 2                     |
| 3.22      | 3.74       | 90   | 87       | 82       | 2                     |
| 4.78      | 5.89       | 112  | 78       | 90       | 2                     |
| 6.44      | 6.22       | 113  | 98       | 141      | 2                     |
| 6.22      | 6.61       | 88   | 86       | 84       | 2                     |
| 2.11      | 3.18       | 106  | 91       | 119      | 2                     |
| 5.78      | 6.39       | 111  | 82       | 94       | 2                     |
| 5.56      | 6.28       | 73   | 71       | 121      | 2                     |
| 3.67      | 3.08       | 99   | 100      | 83       | 2                     |
| 5.78      | 6.39       | 96   | 88       | 97       | 2                     |
| 7         | 7          | 86   | 74       | 59       | 2                     |
| 4.89      | 5.57       | 93   | 89       | 92       | 2                     |

|      |      |     |     |     |   |
|------|------|-----|-----|-----|---|
| 1.78 | 2.01 | 102 | 90  | 101 | 2 |
| 7    | 7    | 82  | 82  | 62  | 2 |
| 6.44 | 6.47 | 72  | 72  | 59  | 2 |
| 5.44 | 6.1  | 97  | 84  | 104 | 2 |
| 6.22 | 6.61 | 93  | 96  | 118 | 2 |
| 6.22 | 6.36 | 99  | 92  | 115 | 2 |
| 6.67 | 6.83 | 94  | 92  | 93  | 2 |
| 6.22 | 6.49 | 88  | 114 | 112 | 2 |
| 6.11 | 6.18 | 73  | 78  | 56  | 2 |
| 1.78 | 2.14 | 97  | 86  | 101 | 2 |
| 6.78 | 6.89 | 83  | 93  | 95  | 2 |
| 5.56 | 6.28 | 87  | 83  | 75  | 3 |
| 6    | 6.38 | 92  | 86  | 86  | 3 |
| 6.11 | 6.06 | 103 | 89  | 117 | 3 |
| 6.67 | 6.83 | 85  | 92  | 67  | 3 |
| 3.67 | 3.96 | 67  | 78  | 37  | 3 |
| 7    | 7    | 78  | 84  | 71  | 3 |
| 4.11 | 5.43 | 68  | 74  | 44  | 3 |
| 5.11 | 5.18 | 95  | 72  | 67  | 3 |
| 7    | 7    | 94  | 109 | 76  | 3 |
| 6    | 6.5  | 75  | 82  | 64  | 3 |
| 7    | 7    | 89  | 82  | 74  | 3 |
| 6.78 | 6.76 | 79  | 82  | 66  | 3 |
| 5.22 | 5.36 | 79  | 77  | 60  | 3 |
| 6.11 | 6.06 | 60  | 82  | 50  | 3 |
| 4.78 | 4.76 | 83  | 83  | 83  | 3 |
| 6.11 | 6.56 | 68  | 66  | 52  | 3 |
| 5.33 | 6.04 | 113 | 92  | 115 | 3 |
| 5.33 | 5.92 | 79  | 77  | 58  | 3 |
| 2.44 | 2.6  | 84  | 92  | 93  | 3 |
| 3.44 | 4.22 | 83  | 80  | 68  | 3 |
| 3.56 | 4.15 | 89  | 83  | 76  | 3 |
| 3.89 | 4.69 | 75  | 83  | 61  | 3 |
| 3.44 | 4.85 | 82  | 73  | 56  | 3 |
| 4.11 | 4.93 | 84  | 93  | 100 | 3 |
| 3.33 | 2.79 | 67  | 73  | 47  | 3 |
| 6.22 | 5.99 | 80  | 82  | 67  | 3 |
| 4.78 | 4.89 | 66  | 71  | 38  | 3 |
| 3.78 | 3.26 | 86  | 109 | 93  | 3 |
| 6    | 6.5  | 54  | 75  | 31  | 3 |
| 1.78 | 2.26 | 53  | 83  | 61  | 3 |
| 6.56 | 6.78 | 74  | 75  | 57  | 3 |
| 5.33 | 5.92 | 59  | 64  | 29  | 3 |
| 1    | 1    | 96  | 76  | 72  | 3 |
| 5.89 | 6.32 | 96  | 94  | 117 | 3 |
| 4.78 | 5.76 | 74  | 80  | 57  | 3 |
| 7    | 7    | 77  | 87  | 80  | 3 |
| 4.33 | 5.67 | 81  | 72  | 53  | 3 |
| 6.56 | 6.78 | 83  | 76  | 51  | 3 |
| 5.89 | 6.44 | 76  | 91  | 81  | 3 |
| 3.89 | 4.57 | 76  | 78  | 53  | 4 |
| 5.89 | 4.82 | 100 | 83  | 88  | 4 |
| 4.89 | 5.69 | 86  | 86  | 69  | 4 |
| 5.89 | 6.44 | 49  | 63  | 25  | 4 |
| 3.78 | 4.39 | 65  | 68  | 35  | 4 |
| 5.22 | 6.11 | 70  | 62  | 30  | 4 |

|      |      |     |    |     |   |
|------|------|-----|----|-----|---|
| 1.89 | 2.57 | 68  | 81 | 57  | 4 |
| 5.78 | 6.01 | 127 | 91 | 123 | 4 |
| 3.67 | 3.33 | 71  | 91 | 73  | 4 |
| 6.44 | 6.47 | 43  | 76 | 30  | 4 |
| 4.56 | 5.65 | 89  | 91 | 97  | 4 |
